# Supplementary material
Source: HighWire-hosted journal article supplement (http://www.qdcxjkg.com/highwire/filestream/131547/field_highwire_adjunct_files/0/ERJ-00699-2016_Appendix_1.pdf)
Supplement: ERJ-00699-2016_Appendix_1.pdf [file ERJ-00699-2016_Appendix_1.pdf]

## Appendix 1

Literature search strategies, 24<sup>th</sup> September 2015

**Ovid MEDLINE(R) <1946 to September Week 2 2015>**

**Ovid MEDLINE(R) Daily Update <September 22, 2015>**

---

- 1 exp Asthma/
- 2 Cough/
- 3 Dyspnea/
- 4 (asthma\* or cough\* or dyspne\* or dyspnoe\* or wheeze\* or wheezing).ti,ab.
- 5 (difficult\* adj3 breath\*).ti,ab.
- 6 or/1-5
- 7 exp Nitric Oxide/
- 8 Breath Tests/
- 9 (nitr\* adj2 oxid\*).ti,ab.
- 10 niox\*.mp.
- 11 (ENO or FENO).mp.
- 12 or/7-11
- 13 6 and 12
- 14 limit 13 to systematic reviews
- 15 limit 13 to meta analysis
- 16 (systemat\* adj2 review\*).ti,ab.
- 17 (meta-analys\* or metaanalys\* or meta analys\*).ti,ab.
- 18 13 and (16 or 17)
- 19 14 or 15 or 18
- 20 remove duplicates from 19

**Ovid MEDLINE(R) In-Process & Other Non-Indexed Citations <September 22, 2015>**

---

- 1 (asthma\* or cough\*).ti,ab,kw.
- 2 (dyspne\* or dyspnoe\*).ti,ab,kw.
- 3 (difficult\* adj3 breath\*).ti,ab,kw.
- 4 (wheeze or wheezing).ti,ab,kw.
- 5 or/1-4
- 6 nitric oxide.ti,ab,kw.
- 7 (eno or feno).ti,ab,kw.
- 8 niox.af.
- 9 or/6-8
- 10 5 and 9
- 11 (systemat\* adj2 review\*).ti,ab.
- 12 (meta-analys\* or metaanalys\* or meta analys\*).ti,ab.
- 13 10 and (11 or 12)
- 14 limit 10 to systematic reviews
- 15 limit 10 to meta analysis
- 16 13 or 14 or 15

**Cochrane Database of Systematic Reviews <2005 to August 2015>**

---

1 (asthma\* or cough\*).ti,ab,kw.

2 (dyspnea\* or dyspnoe\*).ti,ab,kw.

3 (difficult\* adj3 breath\*).ti,ab,kw.

4 (wheeze or wheezing).ti,ab,kw.

5 1 or 2 or 3 or 4

6 nitric oxide.ti,ab,kw.

7 (eno or feno).ti,ab,kw.

8 niox.af.

9 6 or 7 or 8

10 5 and 9

## Centre for Reviews and Dissemination

| Line | Search                                         |
|------|------------------------------------------------|
| 1    | MeSH DESCRIPTOR asthma EXPLODE ALL TREES       |
| 2    | MeSH DESCRIPTOR cough EXPLODE ALL TREES        |
| 3    | MeSH DESCRIPTOR dyspnea EXPLODE ALL TREES      |
| 4    | (asthma*)                                      |
| 5    | (cough*)                                       |
| 6    | (wheeze OR wheezing)                           |
| 7    | (difficult* NEAR3 breath*)                     |
| 8    | (dyspne* OR dyspnoe*)                          |
| 9    | #1 OR #2 OR #3 OR #4 OR #5 OR #6 OR #7 OR #8   |
| 10   | MeSH DESCRIPTOR nitric oxide EXPLODE ALL TREES |
| 11   | (nitric oxide)                                 |
| 12   | (feno OR eno)                                  |
| 13   | (niox)                                         |
| 14   | #10 OR #11 OR #12 OR #13                       |
| 15   | #9 AND #14                                     |

## NLM PubMed

| Search | Query                                                                                                                                                                                                                                                               |
|--------|---------------------------------------------------------------------------------------------------------------------------------------------------------------------------------------------------------------------------------------------------------------------|
| #8     | Search (#6 AND #7)                                                                                                                                                                                                                                                  |
| #7     | Search publisher[sb]                                                                                                                                                                                                                                                |
| #6     | Search (#4 AND #5)                                                                                                                                                                                                                                                  |
| #5     | Search (asthma*[Title/Abstract] OR cough*[Title/Abstract] OR dyspn*[Title/Abstract] OR wheeze[Title/Abstract] OR wheezing[Title/Abstract] OR difficult* breath*[Title/Abstract] OR difficult* in breathing[Title/Abstract] OR breathing difficult*[Title/Abstract]) |
| #4     | Search (asthma OR cough OR dyspnea[MeSH Terms])                                                                                                                                                                                                                     |
| #3     | Search (#1 AND #2)                                                                                                                                                                                                                                                  |
| #2     | Search (ENO[Title/Abstract] OR FENO[Title/Abstract] OR nitric oxide[Title/Abstract] OR niox[Title/Abstract])                                                                                                                                                        |
| #1     | Search nitric oxide[MeSH Terms]                                                                                                                                                                                                                                     |

## NLM PubMed

| Search | Query                                                                                                                                                                                                                                                                 |
|--------|-----------------------------------------------------------------------------------------------------------------------------------------------------------------------------------------------------------------------------------------------------------------------|
| #18    | Search (#8 AND #17)                                                                                                                                                                                                                                                   |
| #17    | Search (#9 OR #10 OR #11 OR #12 OR #13 OR #14 OR #15 OR #16)                                                                                                                                                                                                          |
| #16    | Search placebo*                                                                                                                                                                                                                                                       |
| #15    | Search treatment outcome[MeSH Terms]                                                                                                                                                                                                                                  |
| #14    | Search usefulness[Title]                                                                                                                                                                                                                                              |
| #13    | Search ((response[Title/Abstract] OR responding[Title/Abstract])) AND (therapy[Title/Abstract] OR therapies[Title/Abstract] OR treat*[Title/Abstract] OR treatm*[Title/Abstract] OR treati*[Title/Abstract])                                                          |
| #12    | Search (predict*[Title/Abstract] AND value*[Title/Abstract])                                                                                                                                                                                                          |
| #11    | Search (prospect* OR cross-over OR control group* OR healthy control*)                                                                                                                                                                                                |
| #10    | Search (random* OR clinical trial* OR clinicaltrial* OR multicen*)                                                                                                                                                                                                    |
| #9     | Search (random*[Title/Abstract] OR clinical trial*[Title/Abstract] OR clinicaltrial*[Title/Abstract] OR multicen*[Title/Abstract])                                                                                                                                    |
| #8     | Search (#3 AND #7)                                                                                                                                                                                                                                                    |
| #7     | Search (#4 OR #5 OR #6)                                                                                                                                                                                                                                               |
| #6     | Search (exhalation OR breath tests[MeSH Terms])                                                                                                                                                                                                                       |
| #5     | Search (nitric[Title/Abstract] OR feno[Title/Abstract] OR eno[Title/Abstract] OR "exhaled NO"[Title/Abstract])                                                                                                                                                        |
| #4     | Search nitric oxide[MeSH Terms]                                                                                                                                                                                                                                       |
| #3     | Search (#1 AND #2)                                                                                                                                                                                                                                                    |
| #2     | Search (asthma*[Title/Abstract] OR cough*[Title/Abstract] OR dyspn*[Title/Abstract] OR wheeze*[Title/Abstract] OR wheezing[Title/Abstract] OR breathing difficulty[Title/Abstract] OR breathing difficulties[Title/Abstract] OR difficult to breathe[Title/Abstract]) |
| #1     | Search (dyspnea OR asthma OR cough[MeSH Terms])                                                                                                                                                                                                                       |
